# Supplementary material
Source: Springer Nature journal article supplement (https://www.springermedizin.de/resource/supplementary/13027_2011_281_MOESM3_ESM.pdf/25656790)
Supplement: MOESM3 [file 25656790]

**Table 6: HPV Seroprevalence among women with and without invasive cervical cancer**

| Author                | Area, subjects                                                                                                                                                             | Study design    | HPV test                                       | HPV seroprevalence for any and type specific genotypes                                                                                                                                                                                                                                                  | HPV seroprevalence of any and type specific genotypes among HIV positive women                                                                                                          | Comments                                                                                                                                                                                                |
|-----------------------|----------------------------------------------------------------------------------------------------------------------------------------------------------------------------|-----------------|------------------------------------------------|---------------------------------------------------------------------------------------------------------------------------------------------------------------------------------------------------------------------------------------------------------------------------------------------------------|-----------------------------------------------------------------------------------------------------------------------------------------------------------------------------------------|---------------------------------------------------------------------------------------------------------------------------------------------------------------------------------------------------------|
| Newton, et al., 200)  | Mulago hospital, 191 cervical cancer cases and 336 controls; 15 years and older with a new diagnosis of cancer from the wards or outpatient clinics between 1994 and 1998. | Case Control    | HPV L1 VLP/ ELISA                              | <p><b>Cases</b></p> <p><i>Type-specific genotypes<sup>a</sup></i></p> <p>HPV 16, 27%</p> <p>HPV 18, 7%</p> <p>HPV 45, 9%</p> <p><b>Controls</b></p> <p>Any of 3 HPV types<sup>a</sup>, 17%</p> <p><i>Type-specific genotypes<sup>a</sup></i></p> <p>HPV 16, 11%</p> <p>HPV 18, 5%</p> <p>HPV 45, 6%</p> | <p><i>HIV Positive Controls</i></p> <p>Any of 3 HPV types<sup>a</sup>, 22%</p> <p><i>Type-specific genotypes<sup>a</sup></i></p> <p>HPV 16, 16%</p> <p>HPV 18, 7%</p> <p>HPV 45, 8%</p> | <p>Antibodies against HPV 16 were significantly associated with cervical cancer OR* = 2.0 (1.2 – 3.1)</p> <p>The risk increased with increasing anti-HPV 16 antibody titre (P<sub>trend</sub>=0.01)</p> |
| Namujju, et al., 2010 | Naguru and Nsambya Health Centers in Kampala, 2,053 women seeking antenatal services; mean age 23 years (range, 14-48)                                                     | Cross-sectional | Serology/VLP ELISA (6, 11, 16, 18, 31, 33, 45) | Any of the 7 selected HPV types <sup>a</sup> , 57%                                                                                                                                                                                                                                                      |                                                                                                                                                                                         | HIV prevalence <sup>a</sup> , 7.0%                                                                                                                                                                      |

<sup>a</sup>Denominator include all tested women  
OR\* = Odds Ratio
